# Supplementary material for: Metabolomics Analysis Reveals the Participation of Efflux Pumps and Ornithine in the Response of Pseudomonas putida DOT-T1E Cells to Challenge with Propranolol
Source: PLOS journal article supplement (doi:10.1371/journal.pone.0156509), 2016-06-22

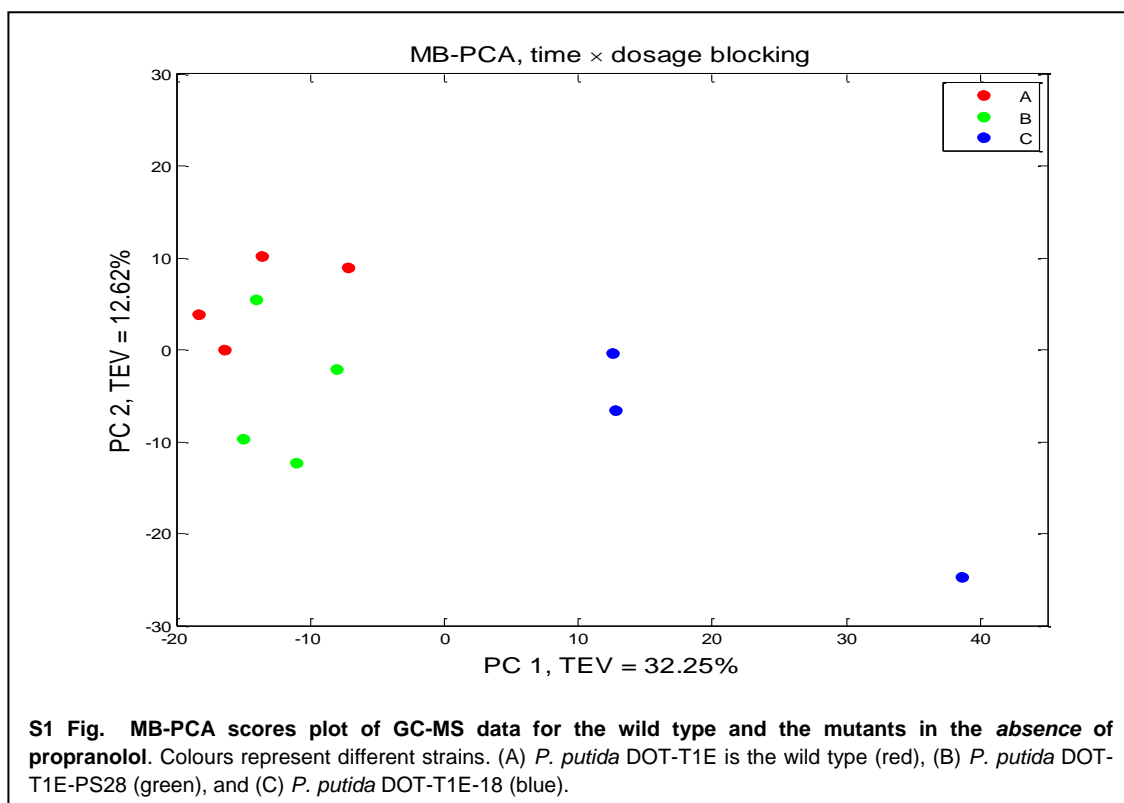

Supplement: S1 (10.1371/journal.pone.0156509.s001) [file journal.pone.0156509.s001]
