# Supplementary material for: Metabolomics Analysis Reveals the Participation of Efflux Pumps and Ornithine in the Response of Pseudomonas putida DOT-T1E Cells to Challenge with Propranolol
Source: PLOS journal article supplement (doi:10.1371/journal.pone.0156509), 2016-06-22
Supplement: S12 (10.1371/journal.pone.0156509.s012) [file journal.pone.0156509.s012]

**S1 Table** The level of metabolites for both mutants compared to the wild type in the central carbon metabolism in *P. putida* DOT-T1E. Metabolites were detected and identified by GC-MS.

| Variable No | Metabolites ID | The level of metabolites* |           |
|-------------|----------------|---------------------------|-----------|
|             |                | M2 vs. M1                 | M3 vs. M1 |
| 14          | Alanine        | up                        | Down      |
| 20          | Valine         | n/c                       | Up        |
| 29          | Leucine        | n/c                       | Up        |
| 34          | Isoleucine     | n/c                       | Up        |
| 40          | Glycine        | down*                     | n/c       |
| 53          | Threonine      | n/c                       | up*       |
| 54          | Serine         | n/c                       | Down      |
| 78          | Aspartic Acid  | down                      | Down      |
| 81          | Methionine     | down                      | Up        |
| 88          | Glutamine      | n/c                       | down*     |
| 95          | Phenylalanine  | n/c                       | up*       |
| 103         | Fumarate       | n/c                       | Up        |
| 109         | Citrate        | down                      | n/c       |
| 119         | Lysine         | up                        | n/c       |
| 135         | Tyrosine       | n/c                       | Up        |
| 177         | Tryptophan     | down                      | up*       |

\*See explanation in Figure S3, M1: DOT-T1E, M2: DOT-T1E-PS28, M3: DOT-T1E-18, n/c: no change
